# Supplementary figures and images for: Novel aromatic polyimides derived from 2,8-di(3-aminophenyl)dibenzofuran. Synthesis, characterization and evaluation of properties
Source: Royal Society of Chemistry journal article supplement (doi:10.1039/c5ra14456f), 2015-01-01

### Supporting Material

#### DSC curves of all polyimides

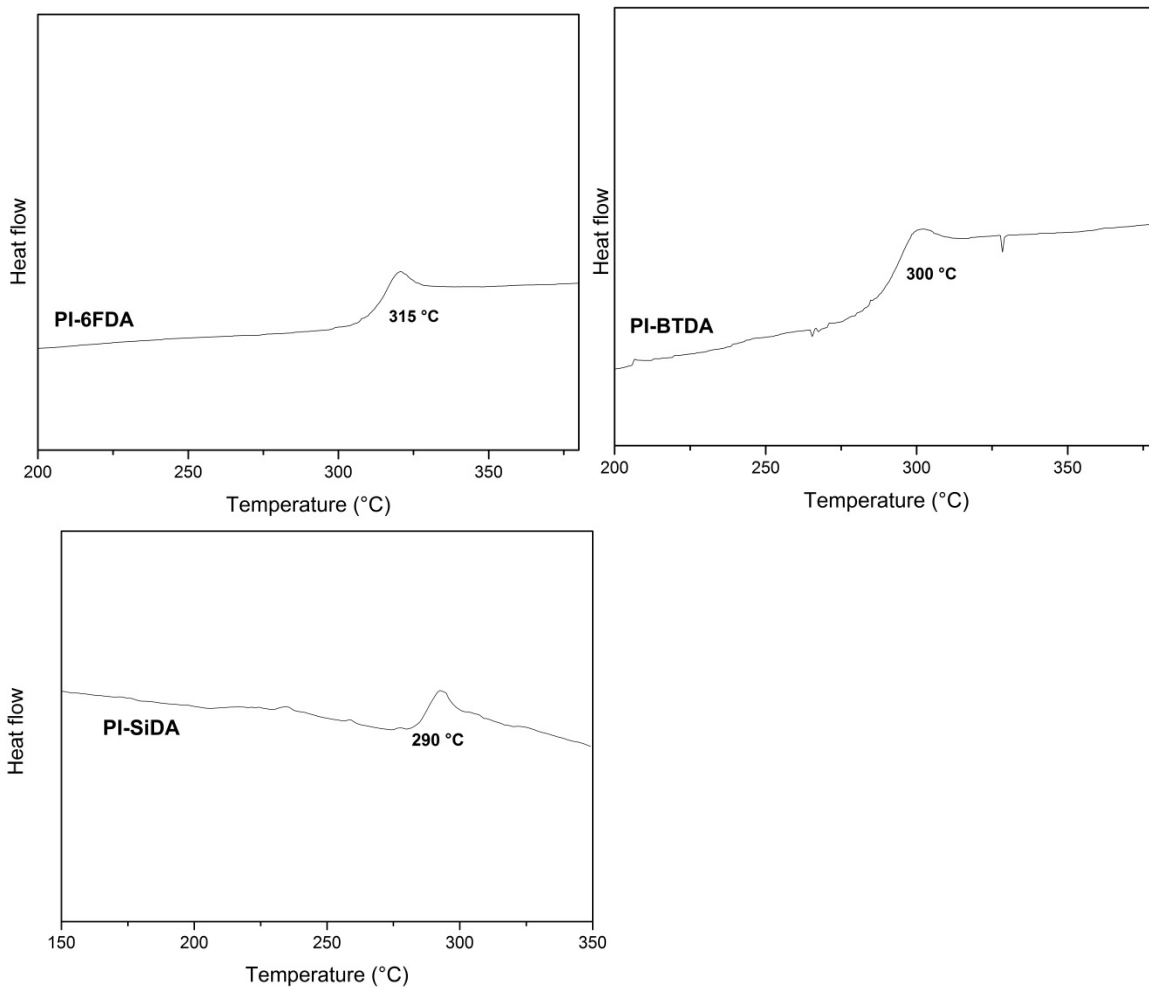

Supplement: c5ra14456f1.pdf [file c5ra14456f1.pdf]
